# Supplementary material for: Anion-sublattice engineering of Li3PS4:Br and I incorporation enhances ionic conductivity and Li-metal compatibility
Source: Royal Society of Chemistry journal article supplement (doi:10.1039/d6sc00740f), 2026-04-27
Supplement: d6sc00740f1.pdf [file d6sc00740f1.pdf]

## **Anion-Sublattice Engineering of $\text{Li}_3\text{PS}_4$ : Br and I Incorporation Enhances Ionic Conductivity and Li-Metal Compatibility**

Tej P. Poudel,<sup>1,2,3,\$</sup> Michael J. Deck,<sup>2,3,\$</sup> Ifeoluwa Peter Oyekunle,<sup>2,3</sup> Pawan K. Ojha,<sup>2,3</sup> Bright Ogbolu,<sup>2,3</sup> Islamiyat Ojelade,<sup>2,3</sup> Thilina N.D.D. Gamaralagale,<sup>2,3</sup> Erica Truong,<sup>2,3</sup> Yongkang Jin,<sup>2,3</sup> Amirhossein Zareihassangheshlaghi,<sup>2</sup> Yan-Yan Hu<sup>1,2,3\*</sup>

1. Materials Science and Engineering Program, Florida State University, Tallahassee, FL 32310, USA
2. Department of Chemistry and Biochemistry, Florida State University, Tallahassee, FL 32306, USA
3. Center for Interdisciplinary Magnetic Resonance, National High Magnetic Field Laboratory, Tallahassee, FL 32310, USA

*<sup>\$</sup>These authors contributed equally*

### **Supporting Information**

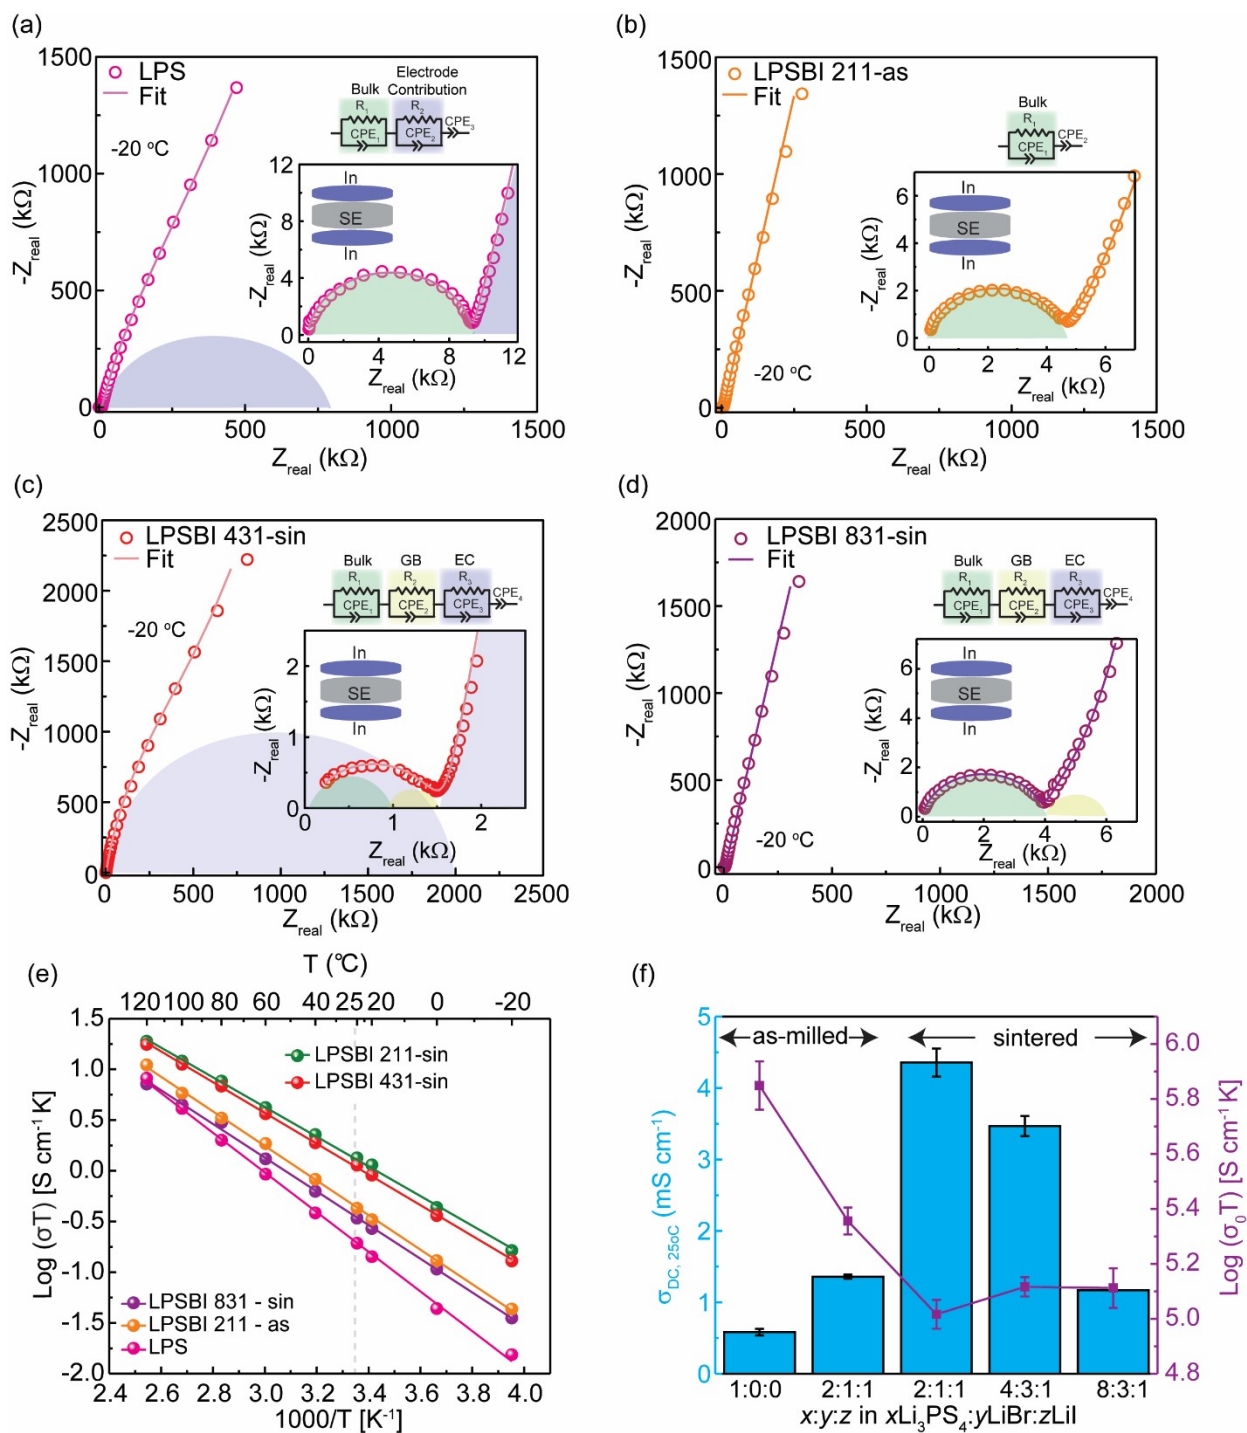

**Figure S1** EIS analysis of  $x\text{Li}_3\text{PS}_4:y\text{LiBr}:z\text{LiI}$ . (a-d) Nyquist plots and the corresponding electrochemical circuit fitting of LPS, LPSBI-as, LPSBI 431-sin, and LPSBI 831-sin. Two semicircles for impedance response are observed, and the Nyquist plot is fitted with the R/Q+R/Q+Q type equivalent circuit. The high-frequency semicircle is attributed to the impedance response from the bulk of SE. The low-frequency semicircle corresponds to an electrode

contribution with a capacitance on the order of  $\mu\text{F}$ . (e) Arrhenius plots of corresponding SEs, the gray dashed line is a visual guide for conductivity at 25 °C. (f) Ionic conductivity and Arrhenius prefactor of different samples prepared with different strategies.

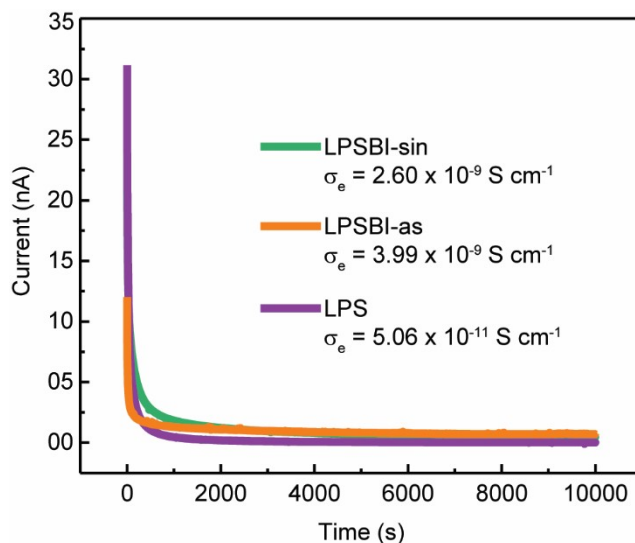

**Figure S2.** The DC polarization current vs. time plot using 0.1 V to determine the electronic conductivity of LPS, LPSBI-as, and LPSBI-sin solid electrolytes.

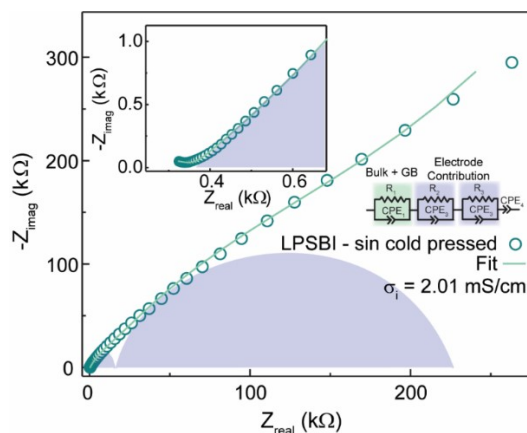

**Figure S3.** Nyquist plot and equivalent circuit fitting of the LPSBI – sin after grinding the pellet into powder and cold pressing again. The three semicircles were observed, with the middle- and low-frequency semicircles assigned to electrode contributions with capacitances of 0.31  $\mu\text{F}$  and 0.21  $\mu\text{F}$ , respectively. The high-frequency semicircle is assigned to both bulk and grain boundary contributions with a capacitance of  $5.8 \times 10^{-10}$  F.

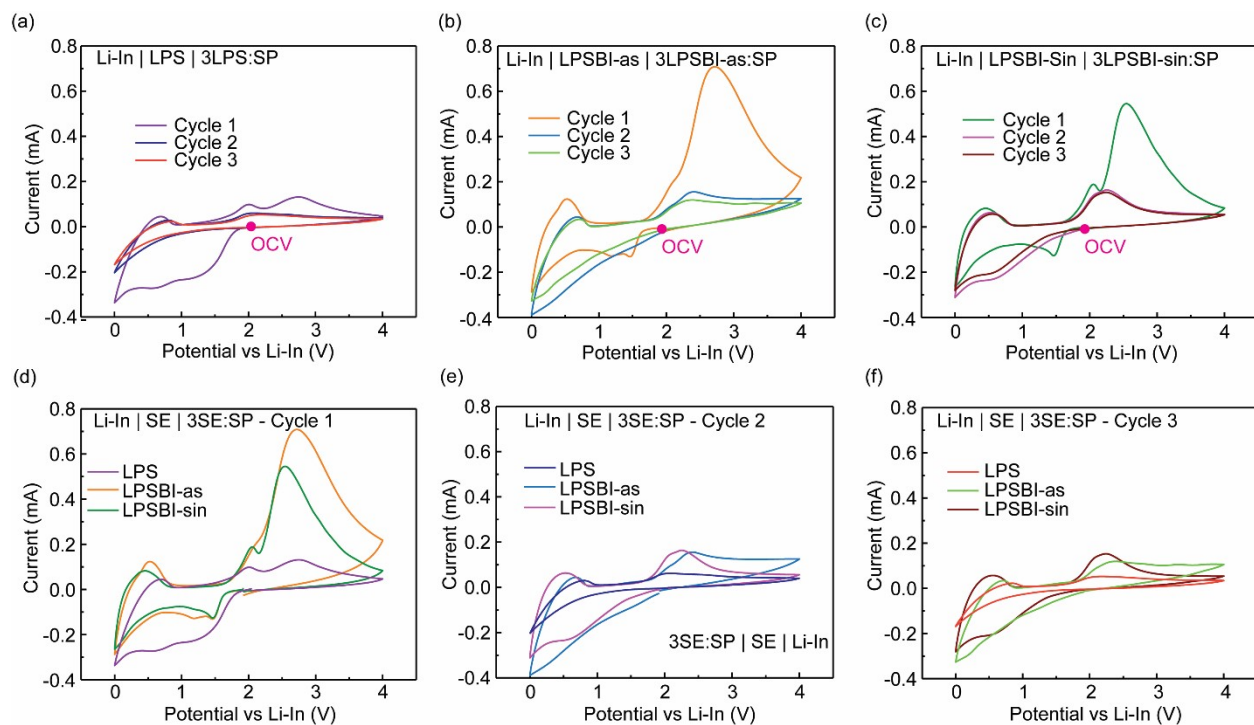

**Figure S4.** Cyclic voltammetry measurement of (a) LPS, (b) LPSBI-as, (c) LPSBI-sin. (d,e,f) show the comparison of the CV profiles of the three SEs for Cycles 1- 3.

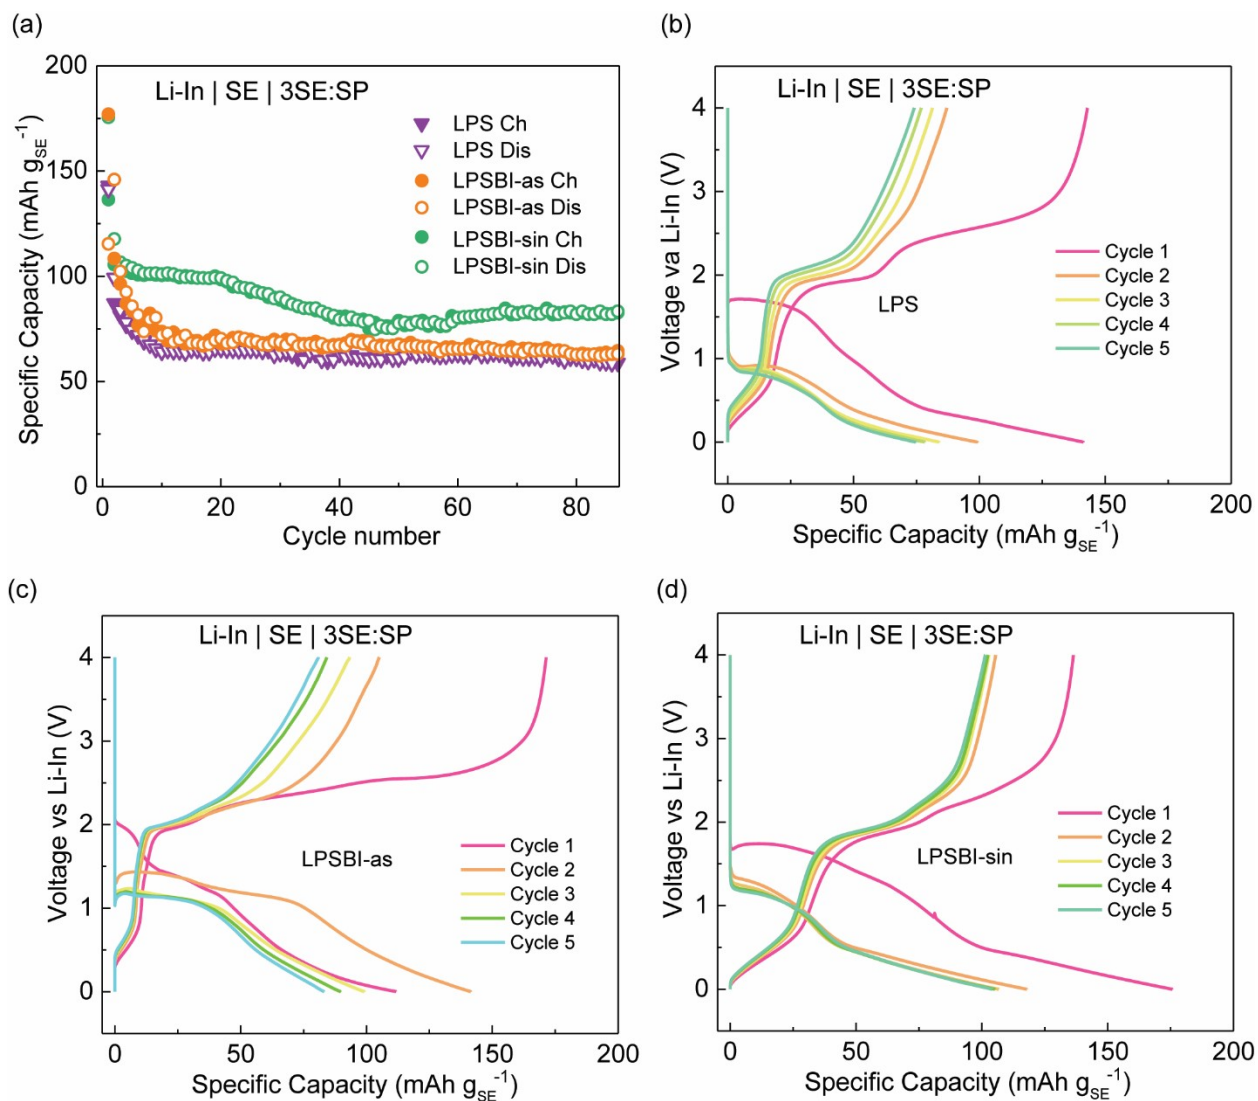

**Figure S5.** Galvanostatic cycling of SE-SP composites to probe reversible capacities. (a) Cycle vs capacity plot for Li-In|SE|3SE:SP cell (SE: LPS, LPSBI-as, or LPSBI-sin; SP: Super P carbon). The voltage profile of the (b) Li-In|LPS|3LPS:SP, (c) Li-In|LPSBI-as|3LPSBI-as:SP, and (d) Li-In|LPSBI-sin|3LPSBI-sin:SP cells.

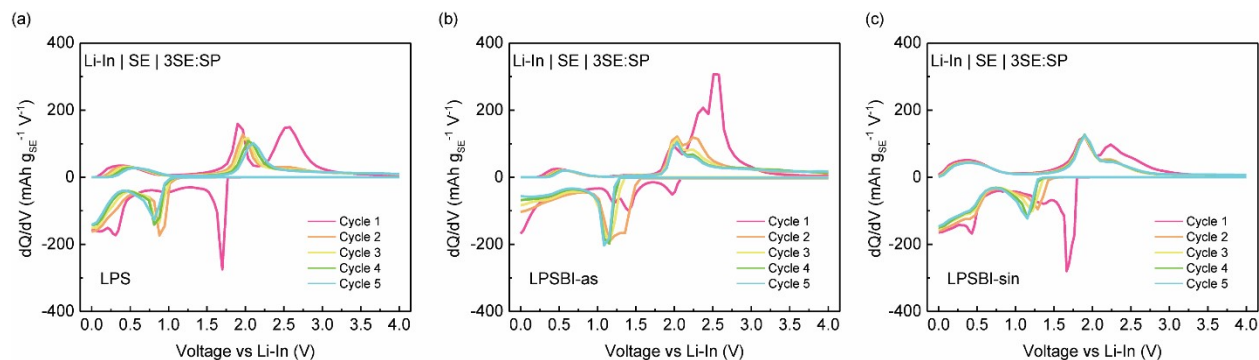

**Figure S6.** Differential capacity plots (a) Li-In|LPS|3LPS:SP, (b) Li-In|LPSBI-as|3LPSBI-as:SP, and (c) Li-In|LPSBI-sin|3LPSBI-sin:SP cells.

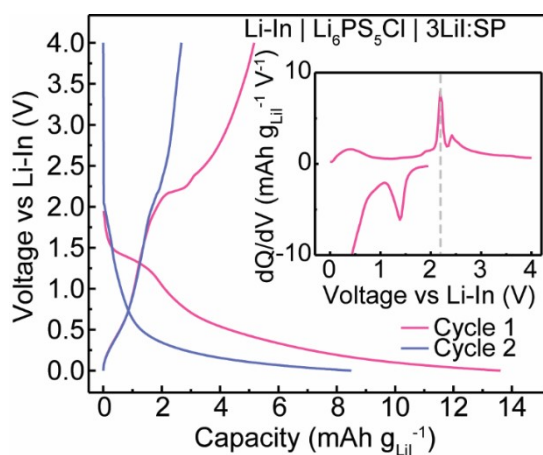

**Figure S7.** The voltage profile of galvanostatic cycling of 3LiI:SP catholyte to extract the information on the onset voltage of LiI oxidation. The inset shows the differential capacity of the first cycle. This LiI oxidation can be observed at an onset voltage of  $\sim 2.25$  V vs. Li-In. This voltage is similar to the onset voltage of the extra reduction peak in the 2LPSBI-sin:TiS<sub>2</sub> cell, which is responsible for increased capacity up to Cycle 88.

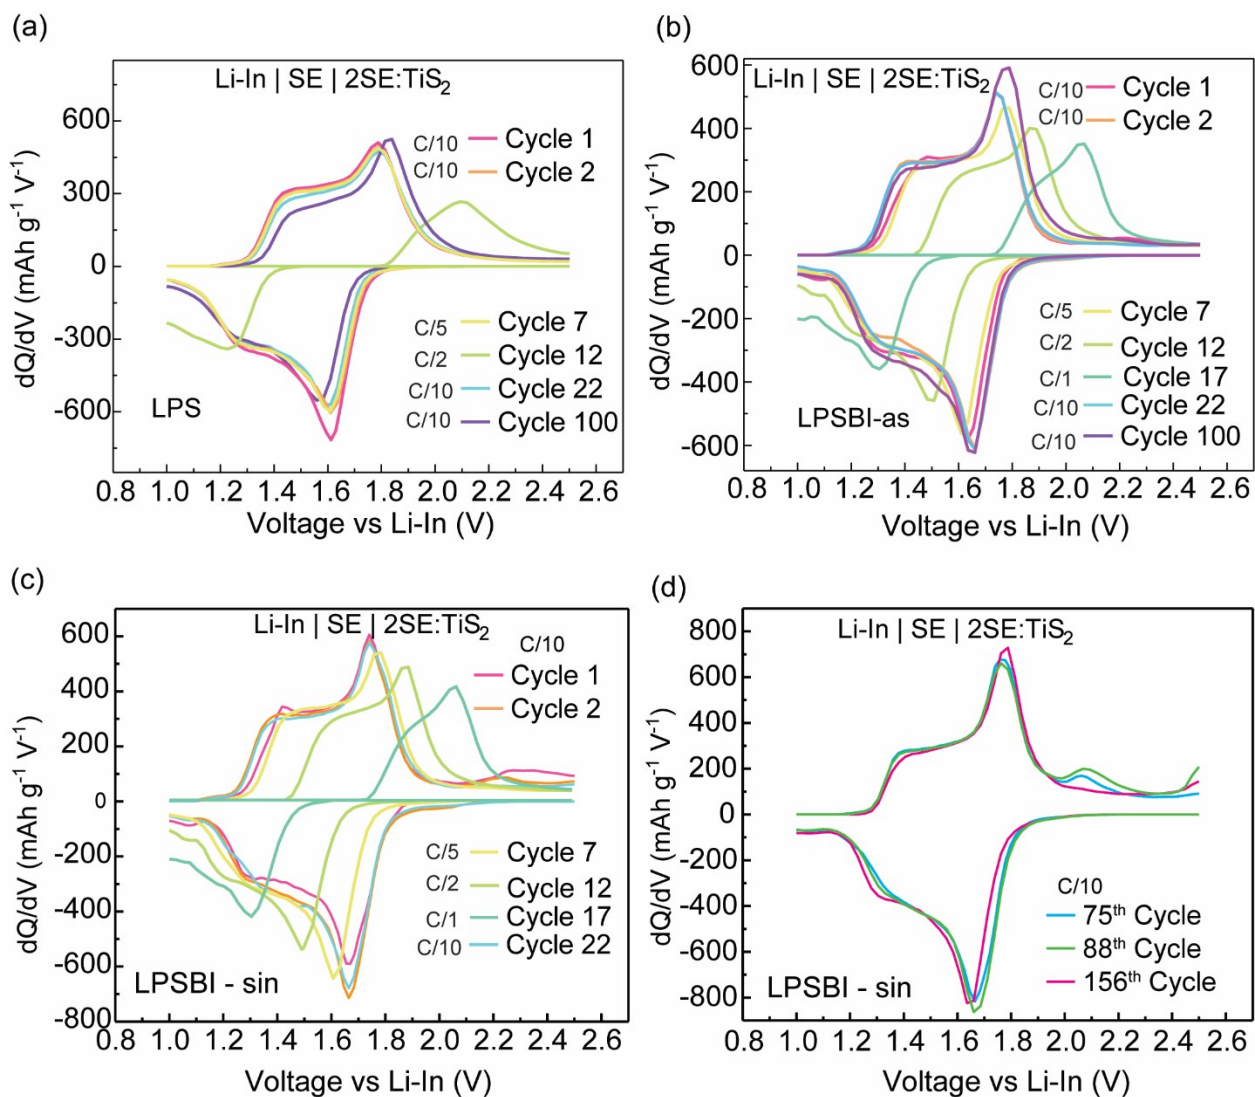

**Figure S8.** Differential capacities of various cycles of (a) Li-In|LPS|2LPS:TiS<sub>2</sub>, (b) Li-In|LPSBI-as|2LPSBI-as:TiS<sub>2</sub>, and (c,d) Li-In|LPSBI-sin|2LPSBI-sin:TiS<sub>2</sub>

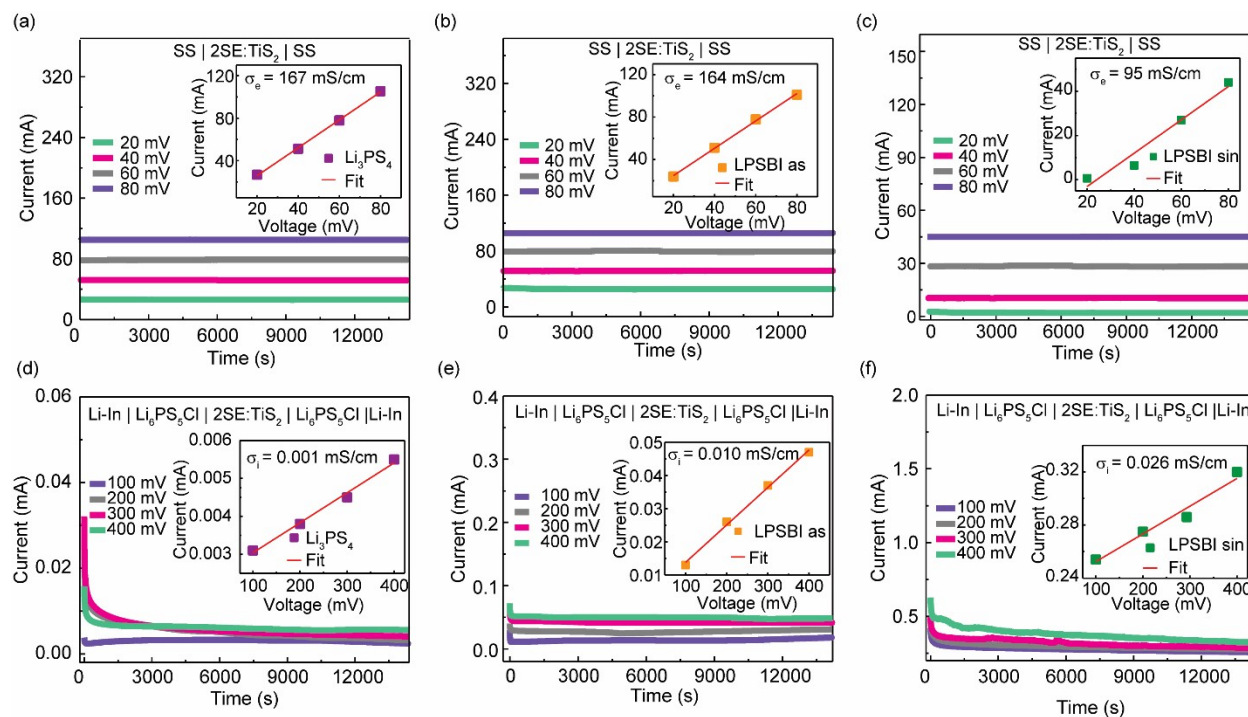

**Figure S9.** DC-Polarization measurements of catholytes to determine  $\sigma_{e,eff}$  and  $\sigma_{i,eff}$ . (a-c) DC-Polarization of SS|2SE:TiS<sub>2</sub>|SS (SE: LPS, LPSBI-as, LPSBI-sin) symmetric cells for determination of  $\sigma_{e,eff}$ , and (d-f) DC-Polarization measurement of Li-In|Li<sub>6</sub>PS<sub>5</sub>Cl|2SE-TiS<sub>2</sub>|Li<sub>6</sub>PS<sub>5</sub>Cl|Li-In (SE: LPS, LPSBI-as, LPSBI-sin) symmetric cells for determination of  $\sigma_{i,eff}$ . The insets display the respective I-V curves of the catholytes at different DC voltages with the linear fits. The electronic and ionic resistances were calculated based on Ohm's law.

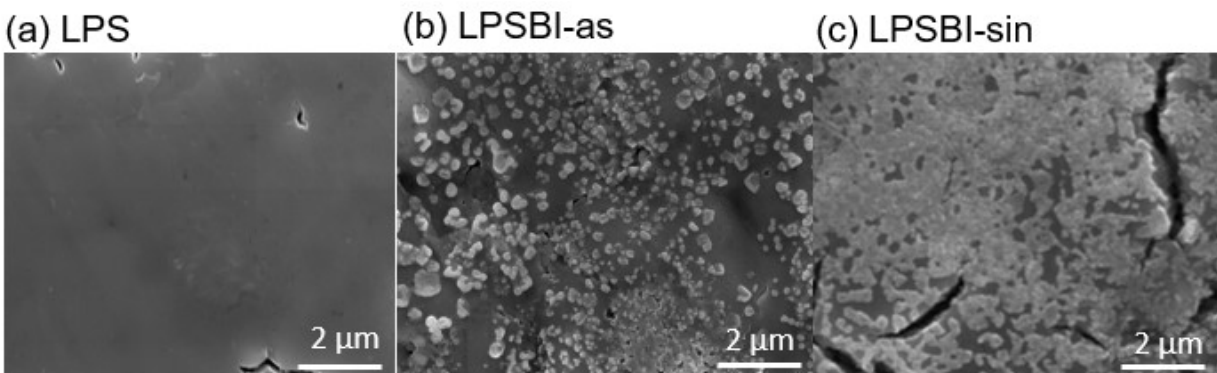

**Figure S10.** SEM images of (a) LPS, (b) LPSBI-as, and (c) LPSBI-sin.

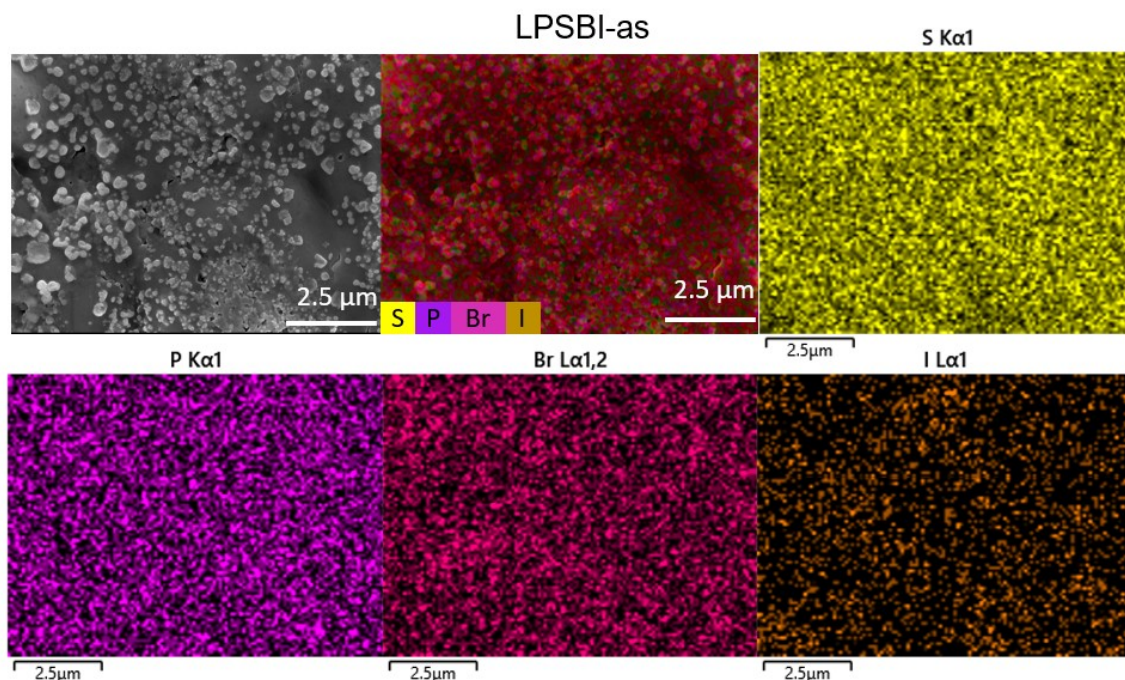

**Figure S11.** SEM and EDX of LPSBI-as with elemental mapping.

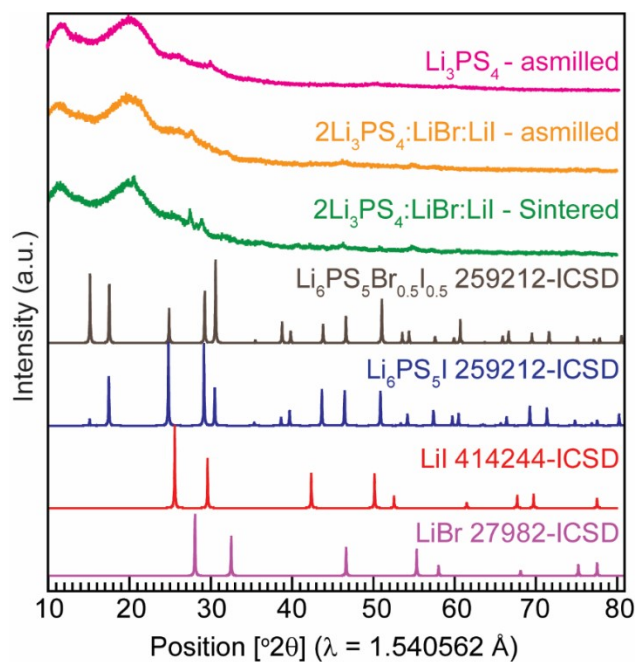

**Figure S12.** XRD patterns of LPS, LPSBI-as, and LPSBI-sin and comparison with reference patterns of LiBr, LiI,  $\text{Li}_6\text{PS}_5\text{Br}_{0.5}\text{I}_{0.5}$ , and  $\text{Li}_6\text{PS}_5\text{I}$  from ICSD.

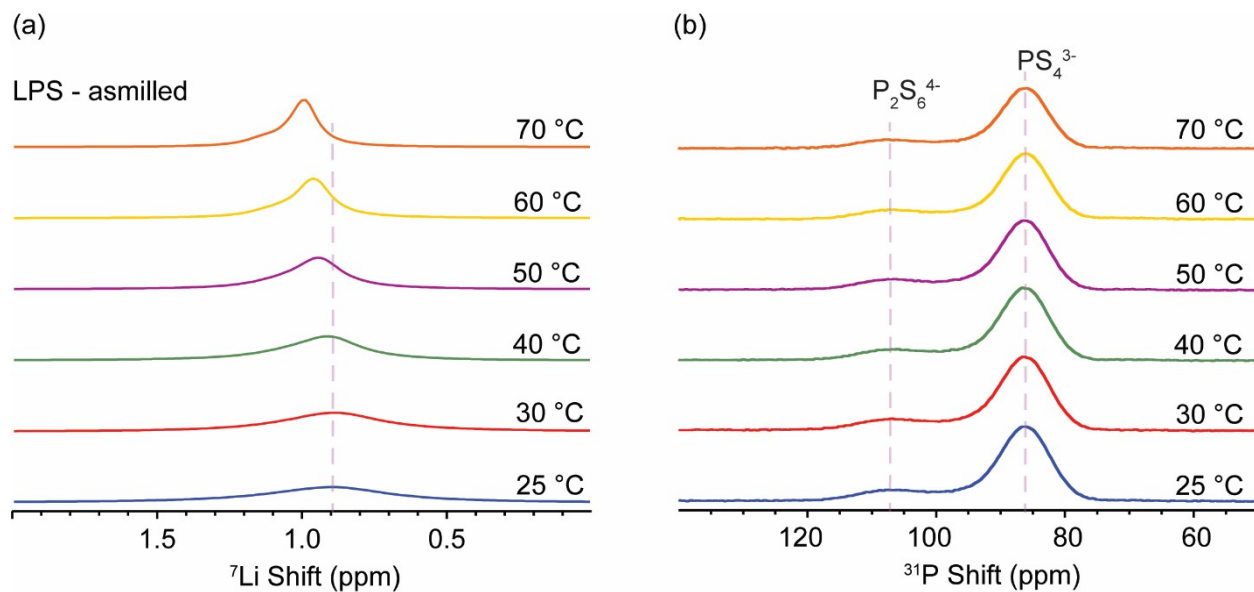

**Figure S13.** (a) Variable-temperature  $^7\text{Li}$  MAS NMR spectra of LPS. (b) Variable-temperature  $^{31}\text{P}$  MAS NMR spectra of LPS; the temperatures are indicated.

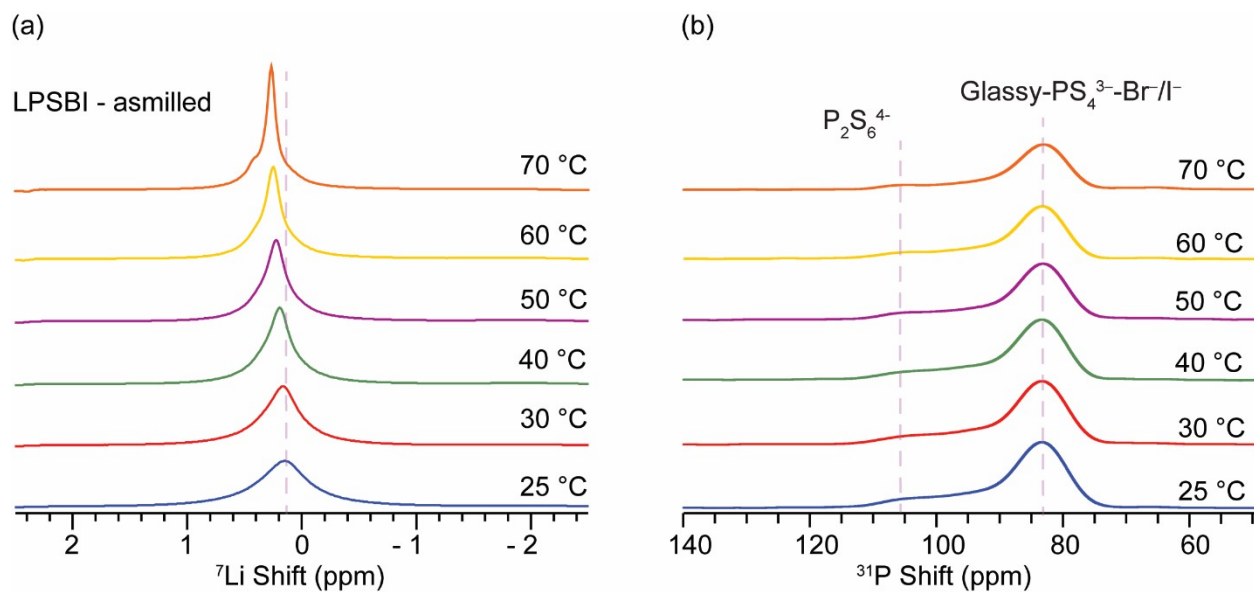

**Figure S14.** (a) Variable-temperature  $^7\text{Li}$  MAS NMR spectra of LPSBI-as. (b) Variable-temperature  $^{31}\text{P}$  MAS NMR spectra of LPSBI-as; the temperatures are indicated.

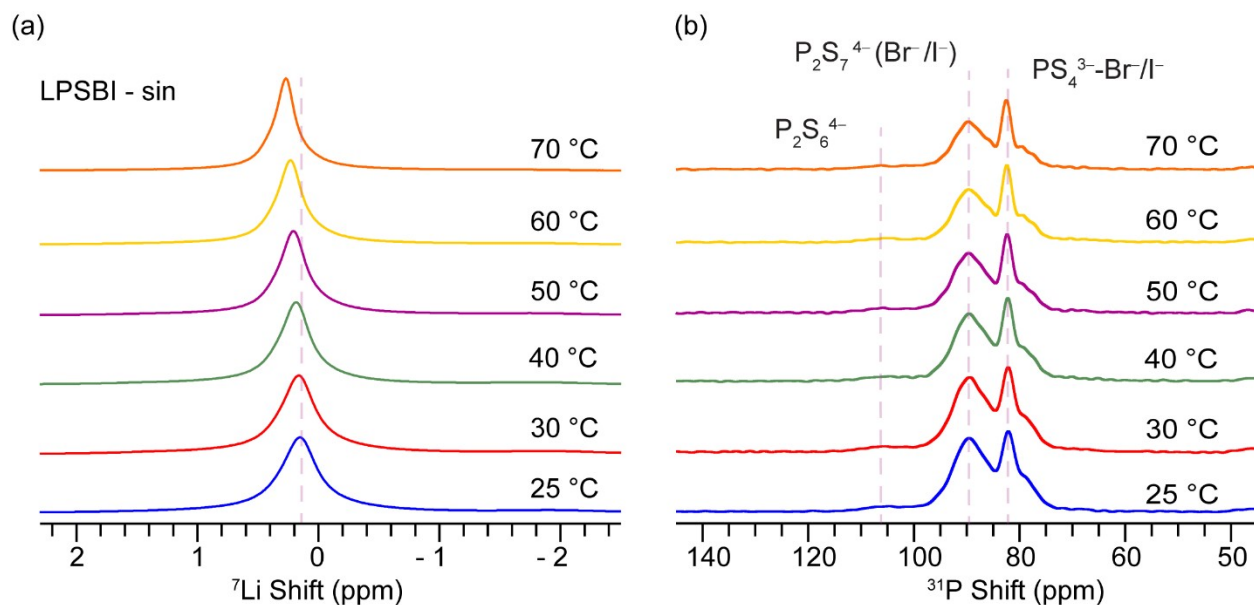

**Figure S15.** (a) Variable-temperature  $^7\text{Li}$  MAS NMR spectra of LPSBI-sin. (b) Variable-temperature  $^{31}\text{P}$  MAS NMR spectra of LPSBI-sin; the temperatures are indicated.

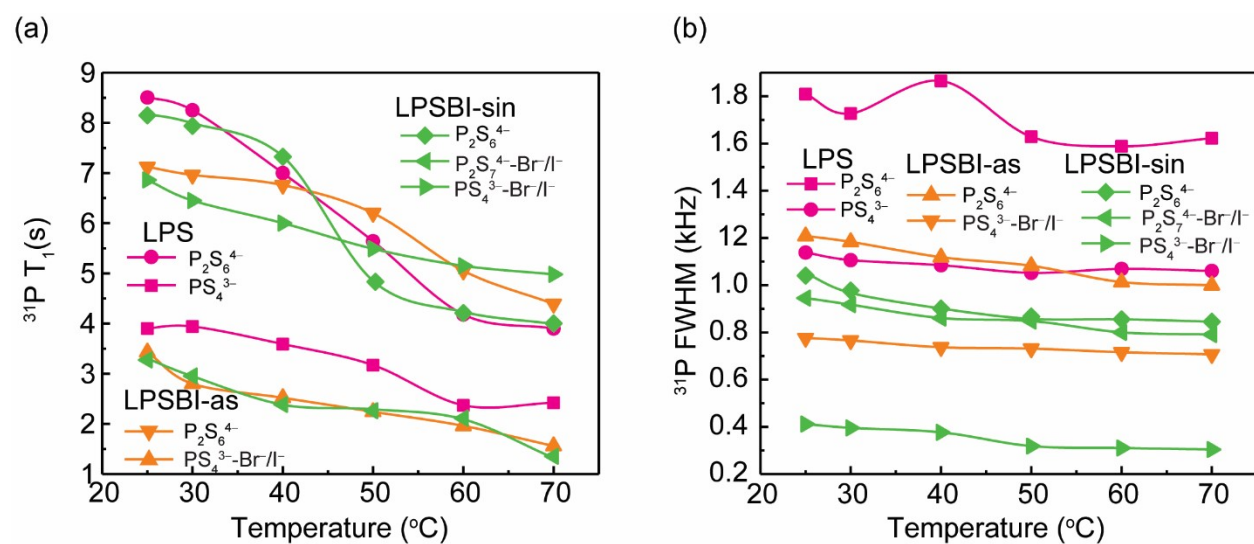

**Figure S16.** Variable-temperature  $^{31}\text{P}$  NMR  $T_1$  times for LPS, LPSBI-as, and LPSBI-sin. (d) Variable-temperature  $^{31}\text{P}$  NMR line widths (full width at half maximum, FWHM) for LPS, LPSBI-as, and LPSBI-sin.

**Table S1.** The ionic conductivities of  $x\text{Li}_3\text{PS}_4:y\text{LiBr}:z\text{LiI}$  were measured at 22 °C.  $2\text{Li}_3\text{PS}_4:\text{LiBr}:\text{LiI}$  shows the highest conductivity of 1.36 mS/cm among the samples before sintering (LPSBI-as) and the highest conductivity of 4.36 mS/cm after sintering (LPSBI-sin) at 22 °C. This sample is selected as the model system for further characterization.

| Composition                                                   | $\sigma_{\text{DC}, 22\text{ °C}}$<br>[mS cm <sup>-1</sup> ] |
|---------------------------------------------------------------|--------------------------------------------------------------|
| $\text{Li}_3\text{PS}_4$ -asmilled                            | 0.51                                                         |
| $\text{Li}_3\text{PS}_4:\text{LiBr}:\text{LiI}$ -asmilled     | 0.57                                                         |
| $2\text{Li}_3\text{PS}_4:\text{LiBr}:\text{LiI}$ - asmilled   | 1.36                                                         |
| $3\text{Li}_3\text{PS}_4:\text{LiBr}:\text{LiI}$ - asmilled   | 0.71                                                         |
| $3\text{Li}_3\text{PS}_4:2\text{LiBr}:2\text{LiI}$ - asmilled | 0.32                                                         |
| $4\text{Li}_3\text{PS}_4:3\text{LiBr}:\text{LiI}$ - asmilled  | 0.91                                                         |
| $8\text{Li}_3\text{PS}_4:3\text{LiBr}:1\text{LiI}$ - asmilled | 0.69                                                         |
| $2\text{Li}_3\text{PS}_4:\text{LiBr}:\text{LiI}$ - sintered   | 4.16                                                         |
| $4\text{Li}_3\text{PS}_4:3\text{LiBr}:\text{LiI}$ - sintered  | 2.88                                                         |
| $8\text{Li}_3\text{PS}_4:3\text{LiBr}:1\text{LiI}$ - sintered | 1.39                                                         |

**Table S2.** Analysis results of NMR data shown in **Figure 6 and 7**, including  $^7\text{Li}$   $T_1$  relaxation time, line broadening, and phase fraction.

| Composition | $^7\text{Li}$ $T_1, 22\text{ °C}$<br>[s] |      | Phase Quantification based on $^6\text{Li}$ NMR |      |      |      |
|-------------|------------------------------------------|------|-------------------------------------------------|------|------|------|
|             | Li1                                      | Li2  | $\text{Li}_4\text{P}_2\text{S}_6$               | Li1  | Li2  | LiBr |
| LPS         | 1.35                                     | 0.92 | -                                               | 59.3 | 40.7 | -    |
| LPSBI-as    | 1.05                                     | 0.75 | -                                               | 45.7 | 52.6 | 1.7  |
| LPSBI-sin   | 1.08                                     | 0.64 | 1.5                                             | 16.7 | 79.5 | 2.3  |

**Table S3.** NMR analysis of model samples, including line broadening, and phase fraction of different components in  $^{31}\text{P}$  shift at 22 °C.

| Composition | <sup>31</sup> P Phase Quantification        |                                                                                 |                                                                                 |                                 |                                          |                                                                |                                                                |
|-------------|---------------------------------------------|---------------------------------------------------------------------------------|---------------------------------------------------------------------------------|---------------------------------|------------------------------------------|----------------------------------------------------------------|----------------------------------------------------------------|
|             | P <sub>2</sub> S <sub>6</sub> <sup>4-</sup> | P <sub>2</sub> S <sub>7</sub> <sup>4-</sup><br>-Br <sup>-</sup> /I <sup>-</sup> | P <sub>2</sub> S <sub>7</sub> <sup>4-</sup><br>-Br <sup>-</sup> /I <sup>-</sup> | β-PS <sub>4</sub> <sup>3-</sup> | Glassy-<br>PS <sub>4</sub> <sup>3-</sup> | PS <sub>4</sub> <sup>3-</sup> -Br <sup>-</sup> /I <sup>-</sup> | PS <sub>4</sub> <sup>3-</sup> -Br <sup>-</sup> /I <sup>-</sup> |
|             |                                             | Yellow-<br>Green                                                                | Light-<br>Green                                                                 | Light-<br>Blue                  | Blue                                     | Green                                                          | Pink                                                           |
| LPS         | 12.7                                        | -                                                                               | -                                                                               | -                               | 87.3                                     | -                                                              | -                                                              |
| LPSBI-as    | 13.5                                        | -                                                                               | -                                                                               | -                               | 86.5                                     | -                                                              | -                                                              |
| LPSBI-sin   | 7.8                                         | 2.6                                                                             | 33.4                                                                            | 1.8                             | 7.2                                      | 35.6                                                           | 11.6                                                           |

**Table S4.** NMR analysis of LPS, LPSBI-as, and LPSBI-sin samples, including <sup>7</sup>Li T<sub>1</sub> relaxation times and linewidths at various temperatures.

| Temperature<br>[°C] | LPS                                   |            | LPSBI-as                              |            | LPSBI-sin                             |            |
|---------------------|---------------------------------------|------------|---------------------------------------|------------|---------------------------------------|------------|
|                     | <sup>7</sup> Li T <sub>1</sub><br>[s] | FWHM<br>Hz | <sup>7</sup> Li T <sub>1</sub><br>[s] | FWHM<br>Hz | <sup>7</sup> Li T <sub>1</sub><br>[s] | FWHM<br>Hz |
| 25                  | 1.35                                  | 54         | 0.98                                  | 62         | 0.50                                  | 48         |
| 30                  | 1.13                                  | 45         | 0.96                                  | 49         | 0.46                                  | 39         |
| 40                  | 0.91                                  | 33         | 0.77                                  | 37         | 0.41                                  | 32         |
| 50                  | 0.73                                  | 24         | 0.63                                  | 31         | 0.37                                  | 23         |
| 60                  | 0.59                                  | 18         | 0.52                                  | 22         | 0.35                                  | 22         |
| 70                  | 0.50                                  | 12         | 0.42                                  | 13         | 0.34                                  | 18         |

**Table S5.** NMR analysis of LPS, including <sup>31</sup>P NMR T<sub>1</sub> relaxation time and line broadening at various temperatures.

| LPS                           |                                       |            |                                             |            |
|-------------------------------|---------------------------------------|------------|---------------------------------------------|------------|
| Temperature<br>[°C]           | <sup>31</sup> P T <sub>1</sub><br>[s] | FWHM<br>Hz | <sup>31</sup> P T <sub>1</sub><br>[s]       | FWHM<br>Hz |
| PS <sub>4</sub> <sup>3-</sup> |                                       |            | P <sub>2</sub> S <sub>6</sub> <sup>4-</sup> |            |
| 25                            | 3.90                                  | 1138       | 8.51                                        | 1809       |
| 30                            | 3.94                                  | 1106       | 8.25                                        | 1727       |
| 40                            | 3.59                                  | 1084       | 7.00                                        | 1865       |
| 50                            | 3.17                                  | 1052       | 5.64                                        | 1628       |
| 60                            | 2.37                                  | 1069       | 4.18                                        | 1588       |
| 70                            | 2.42                                  | 1060       | 3.90                                        | 1622       |

**Table S6.** NMR analysis of LPSBI-as, including <sup>31</sup>P NMR T<sub>1</sub> relaxation time and line broadening at various temperatures.

| LPSBi-as                                                       |                                       |            |                                             |            |
|----------------------------------------------------------------|---------------------------------------|------------|---------------------------------------------|------------|
| Temperature<br>[°C]                                            | <sup>31</sup> P T <sub>1</sub><br>[s] | FWHM<br>Hz | <sup>31</sup> P T <sub>1</sub><br>[s]       | FWHM<br>Hz |
| PS <sub>4</sub> <sup>3-</sup> -Br <sup>-</sup> /I <sup>-</sup> |                                       |            | P <sub>2</sub> S <sub>6</sub> <sup>4-</sup> |            |
| 25                                                             | 3.43                                  | 776        | 7.16                                        | 1208       |
| 30                                                             | 2.80                                  | 766        | 6.96                                        | 1183       |
| 40                                                             | 2.52                                  | 737        | 6.76                                        | 1118       |
| 50                                                             | 2.24                                  | 731        | 6.20                                        | 1082       |
| 60                                                             | 1.96                                  | 715        | 5.05                                        | 1013       |
| 70                                                             | 1.56                                  | 707        | 4.39                                        | 999        |

**Table S7.** NMR analysis of LPSBI-sin, including <sup>31</sup>P NMR T<sub>1</sub> relaxation time and line broadening at various temperatures.

| LPSBI-sin      |                                                    |            |                             |            |                                           |            |
|----------------|----------------------------------------------------|------------|-----------------------------|------------|-------------------------------------------|------------|
| Temperature °C | $^{31}\text{P } T_1$<br>[s]                        | FWHM<br>Hz | $^{31}\text{P } T_1$<br>[s] | FWHM<br>Hz | $^{31}\text{P } T_1$<br>[s]               | FWHM<br>Hz |
|                | $\text{P}_2\text{S}_7^{4-}\text{-Br}^-/\text{I}^-$ |            | $\text{P}_2\text{S}_6^{4-}$ |            | $\text{PS}_4^{3-}\text{-Br}^-/\text{I}^-$ |            |
| 25             | 3.30                                               | 945        | 8.17                        | 1050       | 6.86                                      | 412        |
| 30             | 2.95                                               | 917        | 7.99                        | 967        | 6.45                                      | 395        |
| 40             | 2.38                                               | 861        | 7.33                        | 901        | 6.00                                      | 376        |
| 50             | 2.29                                               | 848        | 4.85                        | 857        | 5.49                                      | 318        |
| 60             | 2.09                                               | 800        | 4.23                        | 855        | 5.15                                      | 310        |
| 70             | 1.32                                               | 791        | 3.99                        | 845        | 4.98                                      | 304        |
